# Supplementary material
Source: publisher site journal article supplement (https://www.dovepress.com/article/468843)
Supplement: Supplementary file 1 [file get_supplementary_file.php]

**Supplemental material**

**Dynamic** **Change of** **Neutrophil-to-Lymphocyte Ratio on Predicting Response of Immune Checkpoint Inhibitors Plus Targeted Therapies for Unresectable Hepatocellular Carcinoma**

**Supplemental material 1.**Patients flow diagrams.


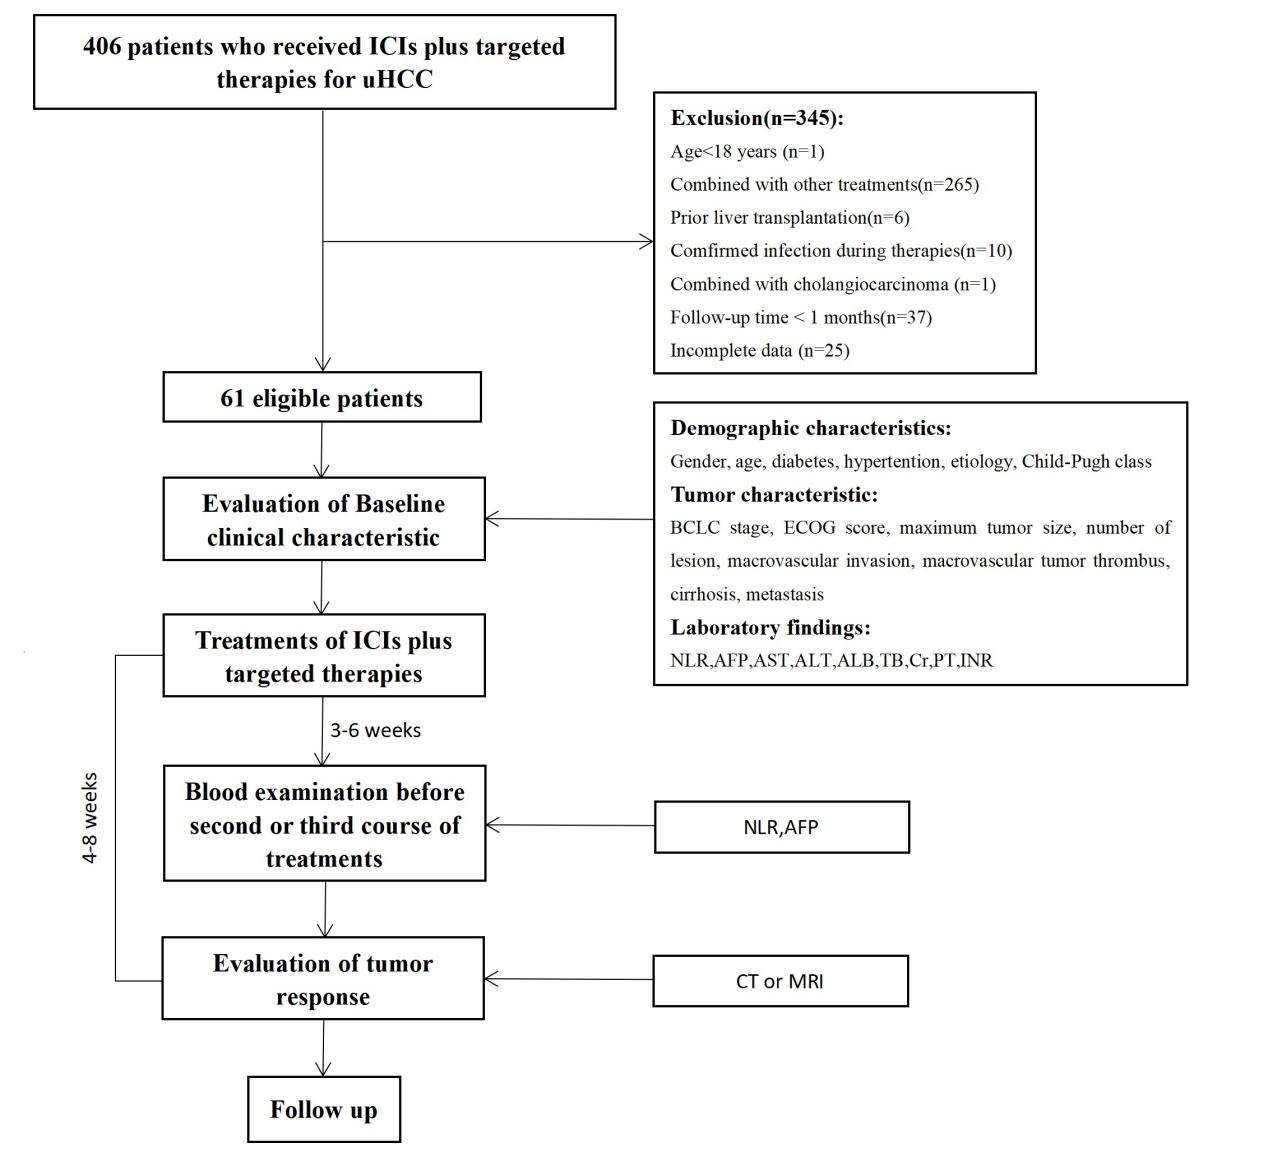


| **ICIs** | **Targeted therapies** | **Patients(n)** |
| --- | --- | --- |
| Sintilimab | Sorafenib | 2 |
| Donafenib | 5 |
| Lenvatinib | 6 |
| Regorafenib | 1 |
| Bevacizumab | 1 |
| Camrelizumab | Apatinib | 10 |
| Regorafenib | 2 |
| Lenvatinib | 8 |
| Sorafenib | 6 |
| Donafenib | 1 |
| Tislelizumab | Apatinib | 2 |
| Lenvatinib | 2 |
| Regorafenib | 1 |
| Atezolizumab | Bevacizumab | 9 |
| Toripalimab | Lenvatinib | 2 |
| Sorafenib | 1 |
| Pembrolizumab | Regorafenib | 1 |
| Lenvatinib | 1 |

**Supplemental material 2.**Regimens of ICIs plus targeted therapies
